# Supplementary material for: Nb-doped TiO2 nanoparticles for organic dye-sensitized solar cells
Source: Royal Society of Chemistry journal article supplement (doi:10.1039/c3ra42081g), 2013-01-01
Supplement: c3ra42081g.pdf [file c3ra42081g.pdf]

# Nb-Doped TiO<sub>2</sub> Nanoparticles for Organic Dye-Sensitized Solar Cells

Sang Gyun Kim,<sup>a,†</sup> Myung Jong Ju,<sup>a,†</sup> In Taek Choi,<sup>a</sup> Won Seok Choi,<sup>a</sup> Hyun-Jung Choi,<sup>b</sup>  
Jong-Beom Baek,<sup>b</sup> and Hwan Kyu Kim<sup>a,\*</sup>

<sup>a</sup>*Global GET-Future Lab. and Department of Advanced Materials Chemistry, Korea University, 2511  
Sejong-ro, Sejong 339-700, Korea*

<sup>b</sup>*Ulsan National Institute of Science and Technology (UNIST), Interdisciplinary School of Green  
Energy/Low-Dimensional Carbon Materials Center, 100 Banyeon, Ulsan 689-798, Korea*

## Corresponding Author

\*hkk777@korea.ac.kr.

† These authors contributed equally to this work.

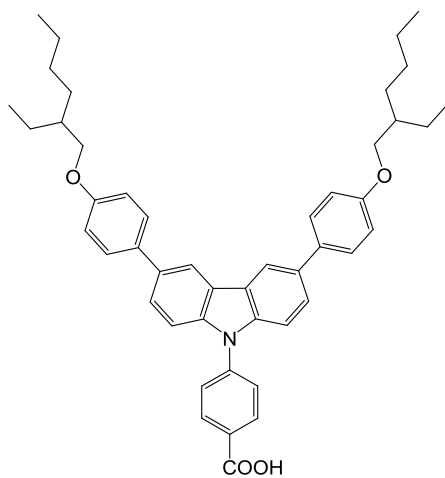

**Fig. S1.** Chemical structure of the multi-functional hole conductor coadsorbent (HC-A).

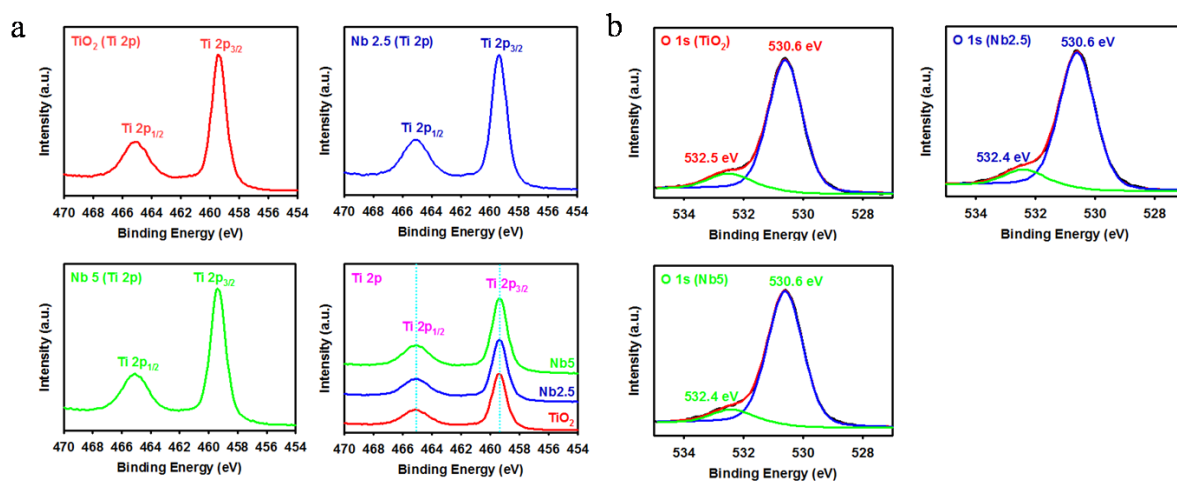

**Fig. S2.** XPS spectra of the (a) Ti 2p and (b) O 1s core levels of undoped and Nb-doped TiO<sub>2</sub>.

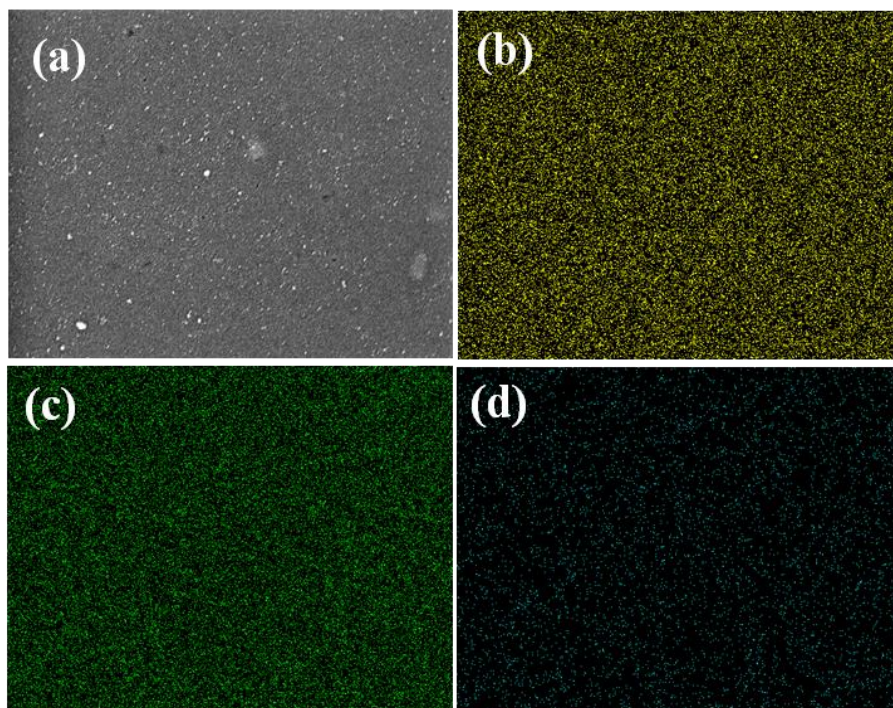

**Fig. S3.** EDX (FE-SEM) image (a) and element mappings of 5 mol% Nb-doped TiO<sub>2</sub>; (b) titanium (Ti); (c) oxygen (O); (d) niobium (Nb).

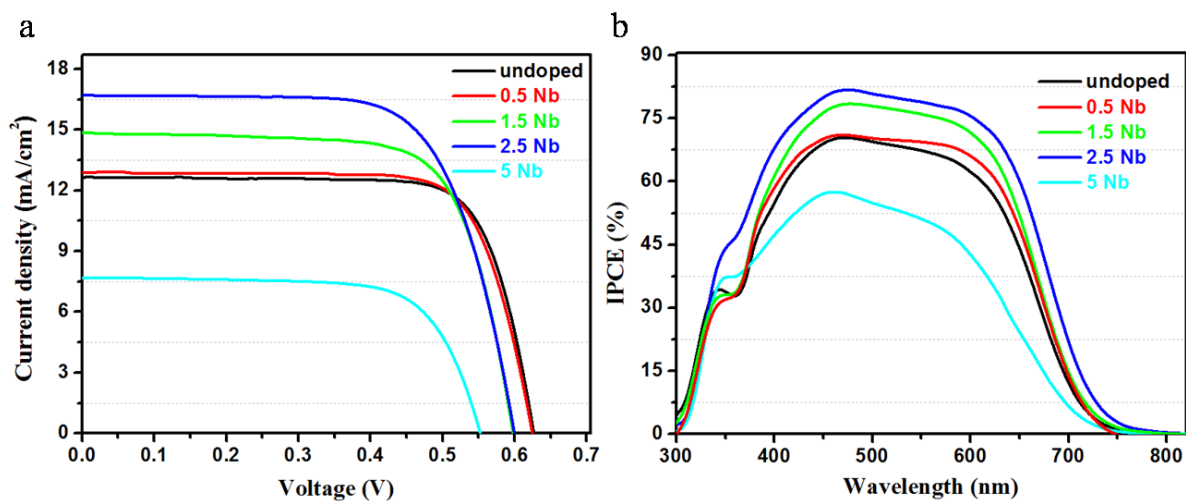

**Fig. S4.** (a) *J*-*V* curves of the NKX2677/DCA-sensitized DSSCs based on the pure TiO<sub>2</sub> and Nb-doped TiO<sub>2</sub> photoanodes with different Nb contents; (b) IPCE spectra of the same devices. The TiO<sub>2</sub> thickness and active area are 16 (8+8) μm and 0.16 cm<sup>2</sup> with a black metal mask, respectively.

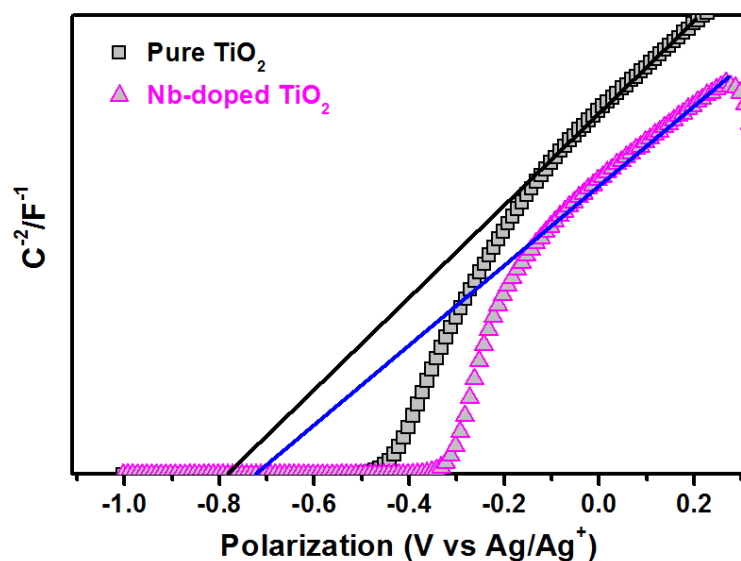

**Fig. S5.** Mott-Schottky plots for the DSSCs based on the undoped and 2.5 mol% Nb-doped  $TiO_2$  films. The measurements were performed at  $f = 80$  Hz with a small amplitude of 10 mV.

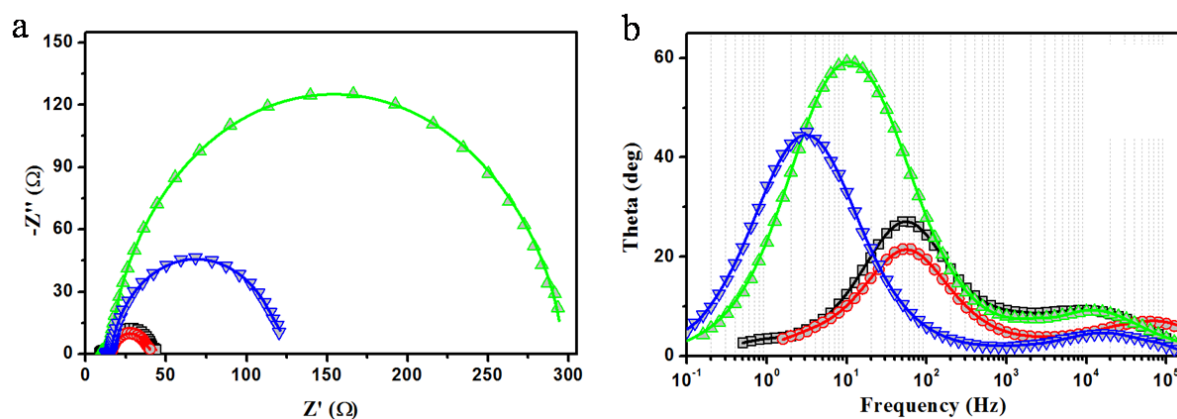

**Fig. S6.** (a) Nyquist plots of electrochemical impedance spectra measured at a forward bias of  $-0.6$  V under dark conditions; (b) Bode plots obtained with the same devices. Undoped  $TiO_2$  (NKX2677, black square); 2.5 mol% Nb-doped  $TiO_2$  (NKX2677, red circle); undoped  $TiO_2$  (NKX2677/HC-A, green triangle); 2.5 mol% Nb-doped  $TiO_2$  (NKX2677/HC-A, blue triangle).

**Table S1.** Performance characteristics of the NKX2677/DCA-sensitized DSSCs based on the undoped and Nb-doped TiO<sub>2</sub> with different Nb contents.

| Photoanodes (TiO <sub>2</sub> ) | $J_{sc}$<br>(mA/cm <sup>2</sup> ) | $V_{oc}$<br>(mV) | $FF$<br>(%) | $\eta$<br>(%) |
|---------------------------------|-----------------------------------|------------------|-------------|---------------|
| Undoped                         | 12.65                             | 0.63             | 76.3        | 6.05          |
| 0.5 mol% Nb-doped               | 12.90                             | 0.62             | 75.3        | 6.07          |
| 1.5 mol% Nb-doped               | 14.85                             | 0.60             | 76.1        | 6.36          |
| 2.5 mol% Nb-doped               | 16.72                             | 0.60             | 69.2        | 6.94          |
| 5 mol Nb-doped                  | 7.70                              | 0.55             | 52.3        | 3.01          |
